# Supplementary material for: FoodPro: A Web-Based Tool for Evaluating Covariance and Correlation NMR Spectra Associated with Food Processes
Source: PubMed Central journal article supplement (PMC5192442; doi:10.3390/metabo6040036), 2016-10-19
Supplement: metabolites-06-00036-s001.pdf [file metabolites-06-00036-s001.pdf]

# Supplementary Materials: FoodPro: A Web-Based Tool for Evaluating Covariance and Correlation NMR Spectra Associated with Food Processes

Eisuke Chikayama, Ryo Yamashina, Keiko Komatsu, Yuuri Tsuboi, Kenji Sakata, Jun Kikuchi and Yasuyo Sekiyama



**Figure S1.** System and entity-relationship diagrams of FoodPro. (a) System diagram. FoodPro is accessible with a web browser. It connects a web server, Apache via the Internet; Apache executes PHP programs; PHP accesses MySQL database and retrieve data; PHP generate HTMLs embedding JavaScript codes; Apache returns the HTMLs to the browser; and finally the browser executes JavaScript and display FoodPro contents; (b) The entity-relationship diagram of FoodPro implemented in MySQL database. FoodPro has six relational database tables. Those are Spectrum (spectrum), Tag (tag), SpectrumTag (tag\_spc), BSpectrum (bspectrum), Bin (bin), and Feature (tag\_feature) tables. Primary keys are drawn upper sides in the rectangles. Field names and data types are drawn in black and brown, respectively. Foreign keys are labeled as FK.



**Figure S2.** Typical CDCl<sub>3</sub> experimental NMR spectra deposited in FoodPro. (a) Peanuts; (b) sesame; (c) avocado; (d) extra-virgin olive oil; (e) grilled pork; (f) beef tallow; (g) coconut oil; (h) egg; (i) salmon roe; (j) raw grouper.



**Figure S3.** (a) PCA score plot for PC1 and PC2 with  $\text{CDCl}_3$  spectra. Note that symbol names represent broad types of processed foods such as fermented or cooked (e.g., Fish g means a fish group.); (b) PCA loading plot for PC1 (blue) and PC2 (red).
